# Supplementary material
Source: PubMed Central journal article supplement (PMC5704929)
Supplement: NIHMS888188-supplement.pdf [file NIHMS888188-supplement.pdf]

**Appendix**  
**Modifiable Lifestyle Risk Factors and Incident Diabetes in African Americans**  
**Joseph et al.**

**Appendix Table 1.** Baseline Characteristics of Included Compared to Excluded Participants

**Appendix Table 2.** Modifiable Lifestyle Risk Factors Correlation Matrix

**Appendix Table 3.** P for Interaction by Age, Gender, BMI, Waist Circumference, Fasting Plasma Glucose, Hemoglobin A1c, Baseline Diabetes Status (Normal Versus Prediabetes), Normal Waist Circumference Versus Central Obesity and BMI <30 vs. BMI  $\geq$ 30 kg/m<sup>2</sup> at Baseline

**Appendix Table 4.** Baseline Characteristics of Participants in the Jackson Heart Study by Incident Diabetes Status

**Appendix Figure1.** Modifiable lifestyle risk factor scores and unadjusted incident diabetes rates per 1,000 person-years.

**Appendix**  
**Modifiable Lifestyle Risk Factors and Incident Diabetes in African Americans**  
**Joseph et al.**

**Appendix Table 1.** Baseline Characteristics of Included Compared to Excluded Participants

| Baseline characteristics <sup>a</sup>                                                          | Included<br>n=3,252          | Excluded<br>n=897             | p-value <sup>a</sup> |
|------------------------------------------------------------------------------------------------|------------------------------|-------------------------------|----------------------|
| Age, years                                                                                     | <b>53.3 (12.5)</b>           | <b>56.0 (14.8)</b>            | <b>p&lt;0.001</b>    |
| Female, N (%)                                                                                  | <b>2,066 (64)</b>            | <b>532 (59)</b>               | <b>p=0.021</b>       |
| Education $\geq$ Bachelor's degree, N (%)                                                      | <b>1,217 (37)</b>            | <b>195 (22)</b>               | <b>p&lt;0.001</b>    |
| Occupation, management/professional, N (%)                                                     | <b>1,287 (40)</b>            | <b>235 (26)</b>               | <b>p&lt;0.001</b>    |
| Alcohol use, N (%)                                                                             | 1,616 (50)                   | 414 (48)                      | p=0.270              |
| Systolic blood pressure (mmHg)                                                                 | <b>125 (17)</b>              | <b>129 (21)</b>               | <b>p&lt;0.001</b>    |
| Diastolic blood pressure (mmHg)                                                                | 79 (10)                      | 79 (11)                       | p=0.401              |
| Waist circumference (cm)                                                                       | 98.6 (15.7)                  | 98.2 (15.7)                   | p<0.573              |
| BMI (kg/m <sup>2</sup> )                                                                       | <b>31.2 (7.0)</b>            | <b>30.6 (7.4)</b>             | <b>p=0.018</b>       |
| Fasting plasma glucose (mmol/l, mg/dL) <sup>b</sup>                                            | <b>5.0 (0.5),<br/>90 (9)</b> | <b>5.1 (0.6),<br/>91 (10)</b> | <b>p&lt;0.001</b>    |
| Hemoglobin A1c (%) <sup>b</sup>                                                                | 5.5 (0.5)                    | 5.5 (0.5)                     | p=0.525              |
| Homeostatic model assessment of insulin resistance (HOMA-IR) (3,125 included and 772 excluded) | 3.6 (2.3)                    | 3.5 (2.1)                     | p=0.558              |
| Adiponectin (ng/mL) (3,193 included, 814 excluded)                                             | <b>5,304 (3,866)</b>         | <b>5,999 (4,827)</b>          | <b>p=0.003</b>       |
| Current smoking, N (%)                                                                         | <b>383 (12)</b>              | <b>184 (22)</b>               | <b>p&lt;0.001</b>    |
| TV watching <1 hour/day, N (%)                                                                 | <b>468 (14)</b>              | <b>112 (13)</b>               | <b>p&lt;0.001</b>    |
| Sleep disordered breathing burden (None), N (%) <sup>c</sup>                                   | 351 (11)                     | 91 (11)                       | p=0.211              |
| Ideal AHA physical activity, N (%) <sup>d</sup>                                                | <b>697 (21)</b>              | <b>160 (18)</b>               | <b>p&lt;0.001</b>    |
| Ideal AHA dietary intake, N (%) <sup>d</sup>                                                   | 24 (0.7)                     | 7 (0.8)                       | p=0.192              |

Notes: Boldface indicates statistical significance ( $p<0.05$ ).

<sup>a</sup> Mean (SD) or percentages are listed,  $p$ -values calculated using chi-square (categorical variables), ANOVA (parametric continuous variables), and Kruskal-Wallis test (non-parametric continuous variables).

<sup>b</sup>SI conversion factors: Fasting plasma glucose conversion to mmol/L (0.0555). Hemoglobin A1c conversion from % to mmol/mol =  $10.93 \times \% - 23.5$ .

<sup>c</sup>The sleep disorder breathing burden score was quantified by first coding the responses to the sleep symptom questions ("Never," "Seldom," "Sometimes," "Often," or "Almost always") from 0 for "Never" to 4 for "Almost always" and then summing the individual scores, resulting in a sleep burden score that ranged from 0 to 20. Sleep burden will be classified as "None" (score: 0), "Mild" (score: 1–5), "Moderate" (score: 6–10), and "Severe" (score: >11)<sup>20</sup>

<sup>d</sup>AHA, American Heart Association, Ideal physical activity and dietary intake recommendations were defined by AHA "2020" guidelines. Physical Activity was considered ideal if participant achieved  $\geq 150$  minutes/week moderate intensity or  $\geq 75$  minutes/week vigorous intensity physical activity or  $\geq 150$  minutes/week moderate/vigorous physical activity, intermediate if participant performed 1–149 minutes/week moderate intensity or 1–74 minutes/week vigorous intensity physical activity or 1–149 minutes/week of moderate/vigorous intensity physical activity and poor if less than these levels. Dietary Intake was considered ideal (4–5 out of 5), intermediate (2–3 out of 5) or poor (0–1 out of 5) of the following recommendations: Fruits and vegetables  $\geq 4.5$  cups/day; fish  $\geq$  two 3.5 oz servings per week (non-fried fish); fiber-rich whole grains  $\geq$  three 1 oz-equivalent servings/day; sodium <1,500 mg/day; sugar-sweetened beverages  $\leq 450$  kcal (36 oz)/week.

**Appendix**  
**Modifiable Lifestyle Risk Factors and Incident Diabetes in African Americans**  
**Joseph et al.**

**Appendix Table 2.** Modifiable Lifestyle Risk Factors Correlation Matrix Using Spearman's Correlation

|                                   | Smoking       | TV watching   | Physical activity | Dietary intake | Sleep disordered breathing burden |
|-----------------------------------|---------------|---------------|-------------------|----------------|-----------------------------------|
| Smoking                           | 1.0000        |               |                   |                |                                   |
| TV watching                       | <b>0.0700</b> | 1.0000        |                   |                |                                   |
| Physical activity                 | <b>0.0672</b> | <b>0.1147</b> | 1.0000            |                |                                   |
| Dietary intake                    | <b>0.0833</b> | <b>0.0442</b> | <b>0.1137</b>     | 1.0000         |                                   |
| Sleep disordered breathing burden | 0.0238        | 0.0207        | 0.0124            | <b>0.0684</b>  | 1.0000                            |

*Notes:* Boldface indicates statistical significance ( $p < 0.05$ ). A Spearman's correlation was run to assess the relationship between modifiable lifestyle risk factors as ordinal variables. Spearman's rho coefficients.

**Appendix**  
**Modifiable Lifestyle Risk Factors and Incident Diabetes in African Americans**  
**Joseph et al.**

**Appendix Table 3.** P for Interaction by Age, Gender, BMI, Waist Circumference, Fasting Plasma Glucose, Hemoglobin A1c, Baseline Diabetes Status (Normal Versus Prediabetes), Normal Waist Circumference Versus Central Obesity and BMI <30 vs. BMI  $\geq$ 30 kg/m<sup>2</sup> at Baseline

| P for interaction <sup>a</sup><br>Variables | Continuous variables |                |                       |                          |                          | Dichotomous variables    |                                    |                                                            |                                            |
|---------------------------------------------|----------------------|----------------|-----------------------|--------------------------|--------------------------|--------------------------|------------------------------------|------------------------------------------------------------|--------------------------------------------|
|                                             | Age                  | Gender         | BMI                   | Waist circumference      | Fasting plasma glucose   | Hemoglobin A1c (HbA1c)   | Normal vs prediabetes <sup>b</sup> | Normal waist circumference vs central obesity <sup>c</sup> | BMI <30 vs BMI $\geq$ 30 kg/m <sup>2</sup> |
| Modifiable lifestyle risk factor score      | <i>p</i> =0.26       | <i>p</i> =0.94 | <b><i>p</i>=0.005</b> | <b><i>p</i>&lt;0.001</b> | <b><i>p</i>&lt;0.001</b> | <b><i>p</i>&lt;0.001</b> | <b><i>p</i>=0.055</b>              | <b><i>p</i>=0.045</b>                                      | <b><i>p</i>=0.095</b>                      |

<sup>a</sup>P for interaction calculated using multiplicative interaction terms with application of the likelihood ratio test (*p*-value <0.10 for statistical significance highlighted in boldface).

<sup>b</sup>Normal = fasting plasma glucose <100 mg/dl and HbA1c <5.7% (<39 mmol/mol), Prediabetes fasting blood glucose 100–125 mg/dl or HbA1c 5.7–6.4% (39 mmol/mol–46 mmol/mol) based on ADA criteria.<sup>40</sup>

<sup>c</sup>Central obesity waist circumference  $\geq$ 102 cm or 40 inches (male),  $\geq$ 88 cm or 35 inches (female) based on U.S. National Cholesterol Education Program Adult Treatment Panel III (2001)<sup>24</sup>

ADA, American Diabetes Association

**Appendix**  
**Modifiable Lifestyle Risk Factors and Incident Diabetes in African Americans**  
**Joseph et al.**

**Appendix Table 4.** Baseline Characteristics of Participants in the Jackson Heart Study by Incident Diabetes Status

| Baseline characteristics <sup>a</sup>                                  | All<br>n=3,252               | (-) Diabetes<br>n=2,692      | (+) Diabetes<br>n=560         | p-value <sup>a</sup> |
|------------------------------------------------------------------------|------------------------------|------------------------------|-------------------------------|----------------------|
| Age, years                                                             | <b>53.3 (12.5)</b>           | <b>53.0 (12.7)</b>           | <b>55.0 (11.1)</b>            | <b>p&lt;0.001</b>    |
| Female, sex, N (%)                                                     | 2,066 (64)                   | 1,717 (64)                   | 349 (62)                      | p=0.514              |
| Education ≥Bachelor's degree, N (%)                                    | <b>1,217 (37)</b>            | <b>1,036 (39)</b>            | <b>181 (32)</b>               | <b>p=0.006</b>       |
| Occupation, management/professional, N (%)                             | <b>1,287 (40)</b>            | <b>1,089 (41)</b>            | <b>198 (35)</b>               | <b>p=0.025</b>       |
| Alcohol use, N (%)                                                     | <b>1,616 (50)</b>            | <b>1,362 (51)</b>            | <b>254 (45)</b>               | <b>p=0.024</b>       |
| Systolic blood pressure (mmHg)                                         | <b>125 (17)</b>              | <b>124 (17)</b>              | <b>128 (18)</b>               | <b>p&lt;0.001</b>    |
| Diastolic blood pressure (mmHg)                                        | <b>79 (10)</b>               | <b>79 (10)</b>               | <b>80 (10)</b>                | <b>p=0.006</b>       |
| Waist circumference (cm)                                               | <b>98.6 (15.7)</b>           | <b>97.2 (15.6)</b>           | <b>105.0 (14.2)</b>           | <b>p&lt;0.001</b>    |
| BMI (kg/m <sup>2</sup> )                                               | <b>31.2 (7.0)</b>            | <b>30.7 (6.9)</b>            | <b>33.6 (7.1)</b>             | <b>p&lt;0.001</b>    |
| Fasting plasma glucose (mmol/l, mg/dl) <sup>b</sup>                    | <b>5.0 (0.5),<br/>90 (9)</b> | <b>4.9 (0.4),<br/>89 (8)</b> | <b>5.4 (0.6),<br/>97 (11)</b> | <b>p&lt;0.001</b>    |
| Hemoglobin A1c (%) <sup>b</sup> (n=3,176)                              | <b>5.5 (0.5)</b>             | <b>5.4 (0.4)</b>             | <b>5.9 (0.4)</b>              | <b>p&lt;0.001</b>    |
| Homeostatic model assessment of insulin resistance (HOMA-IR) (n=3,125) | <b>3.6 (2.3)</b>             | <b>3.3 (2.1)</b>             | <b>5.0 (2.8)</b>              | <b>p&lt;0.001</b>    |
| Adiponectin (ng/mL) (n=3,193)                                          | <b>5,304 (3,866)</b>         | <b>5,563 (4,021)</b>         | <b>4,058 (2,685)</b>          | <b>p&lt;0.001</b>    |
| Current smoking, N (%)                                                 | 383 (12)                     | 315 (12)                     | 68 (12)                       | p=0.955              |
| TV watching <1 hour/day, N (%)                                         | 468 (14)                     | 14.9                         | 12.1                          | p=0.095              |
| Sleep disordered breathing burden (None), N (%) <sup>c</sup>           | <b>351 (11)</b>              | <b>11.0</b>                  | <b>10.0</b>                   | <b>p=0.008</b>       |
| Ideal AHA physical activity, N (%) <sup>d</sup>                        | <b>697 (21)</b>              | <b>597 (22)</b>              | <b>100 (18)</b>               | <b>p=0.023</b>       |
| Ideal AHA dietary intake, N (%) <sup>d</sup>                           | 24 (1)                       | 21 (1)                       | 3 (1)                         | p=0.813              |

Notes: Boldface indicates statistical significance (p<0.05).

<sup>a</sup>Mean (SD) or percentages are listed, p-values calculated using chi-square (categorical variables), ANOVA (parametric continuous variables), and Kruskal-Wallis test (non-parametric continuous variables).

<sup>b</sup>SI conversion factors: Fasting plasma glucose conversion to mmol/L (0.0555). Hemoglobin A1c conversion from % to mmol/mol = 10.93 x % - 23.5

<sup>c</sup>The sleep disorder breathing burden score was quantified by first coding the responses to the sleep symptom questions ("Never," "Seldom," "Sometimes," "Often," or "Almost always") from 0 for "Never" to 4 for "Almost always" and then summing the individual scores, resulting in a sleep burden score that ranged from 0 to 20. Sleep burden will be classified as "None" (score: 0), "Mild" (score: 1–5), "Moderate" (score: 6–10), and "Severe" (score: >11)<sup>20</sup>

<sup>d</sup>AHA, American Heart Association, Ideal physical activity and dietary intake recommendations were defined by AHA "2020" guidelines. Physical activity was considered ideal if participant achieved ≥150 minutes/week moderate intensity or ≥75 minutes/week vigorous intensity physical activity or ≥150 minutes/week moderate/vigorous physical activity, intermediate if participant performed 1–149 minutes/week moderate intensity or 1–74 minutes/week vigorous intensity physical activity or 1–149 minutes/week of moderate/vigorous intensity physical activity and poor if less than these levels. Dietary Intake was considered ideal (4–5 out of 5), intermediate (2–3 out of 5) or poor (0–1 out of 5) of the following recommendations: Fruits and vegetables ≥4.5 cups/day; fish ≥two 3.5 oz servings per week (non-fried fish); fiber-rich whole grains ≥three 1 oz-equivalent servings/day; sodium <1,500 mg/day; sugar-sweetened beverages ≤450 kcal (36 oz)/week.

**Appendix Figure 1.** Modifiable lifestyle risk factor scores and unadjusted incident diabetes rates per 1,000 person-years.

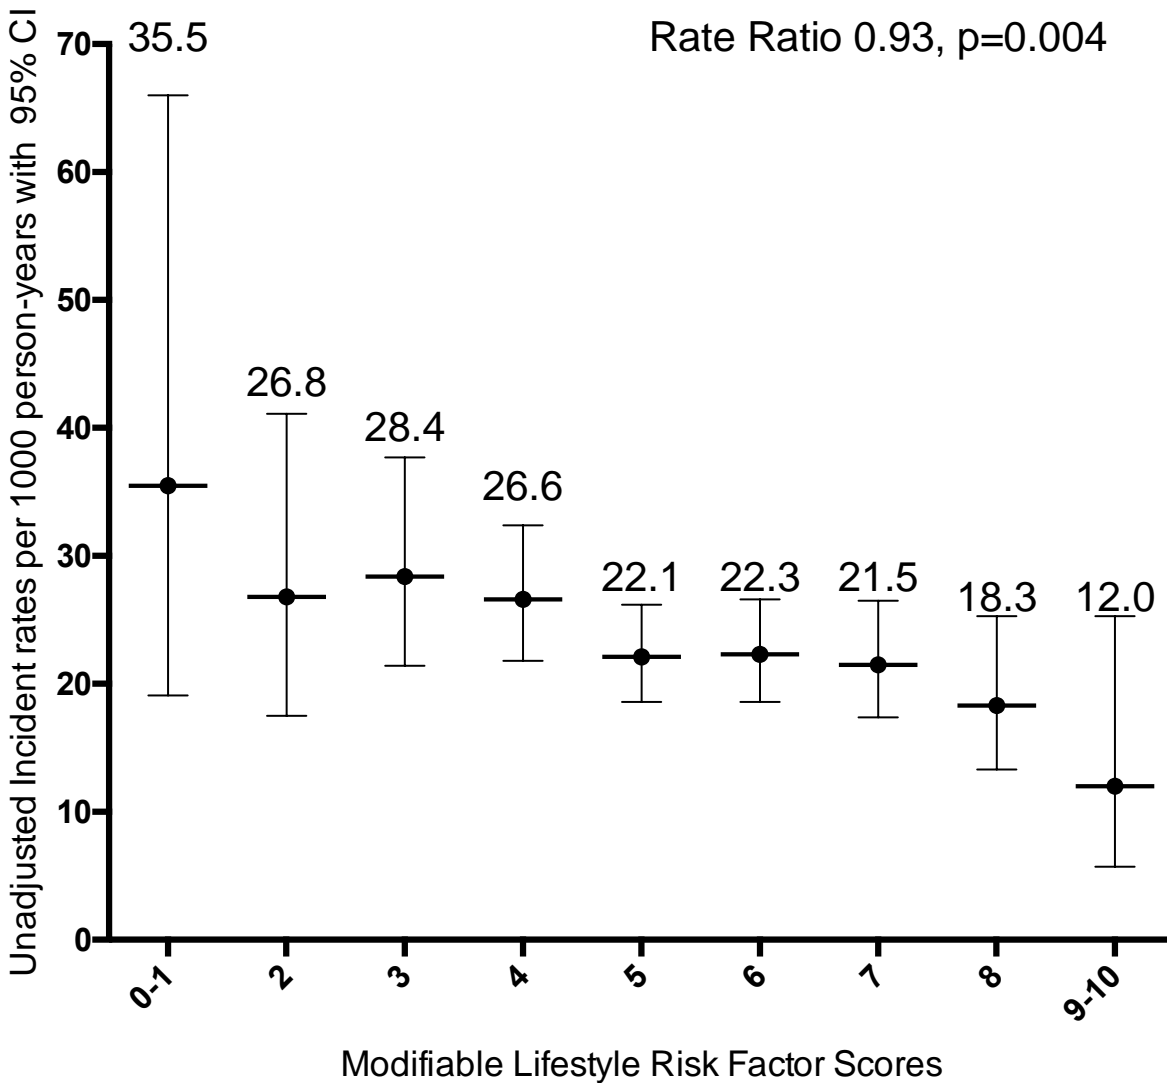

*Notes:* The unadjusted incident rates decreased in a monotonic fashion with a Mantel-Haenszel estimated rate ratio of 0.93 (95% CI 0.88, 0.98,  $p=0.004$ ) per 1 unit in increase in score (0–1 and 9–10 were combined due to a low number of participants in each group). Error bars represent 95% CIs.

Modifiable Lifestyle Risk Factor Score, Total No. Participants (Incident Diabetes Cases)  
 Score 0–1, 37(10), Score 2, 106(21), Score 3, 222(48), Score 4, 494(98), Score 5, 793(132), Score 6, 721(121),  
 Score 7, 536(86), Score 8, 267(37), Score 9–10 76(7)

The modifiable lifestyle risk factor scores were calculated by combining the individuals scores for smoking, TV watching, AHA physical activity, AHA health diet and sleep disordered breathing burden. (*Smoking: Current smoker (0 points), Former  $\leq 12$  months (1 point), Never or quit  $\geq 12$  months (2 points); TV watching:  $>4$  hours/day (0 points), 1–4 hours/day (1 point),  $<1$  hour/day (2 points); AHA physical activity: poor (0 points), intermediate (1 point), ideal (2 points); AHA Healthy Diet: poor (0 points), intermediate (1 point), ideal (2 points); Sleep Disordered Breathing Burden: Severe (0 points), Moderate (1 point), Mild (2 points), None (3 points)*)
